# Supplementary material
Source: Research Square preprint supplement (doi:10.21203/rs.3.rs-9051493/v1)
Supplement: Supplementary file 1 [file 789bb50de9a8184c519f0228.docx]

**Supplementary Figure**


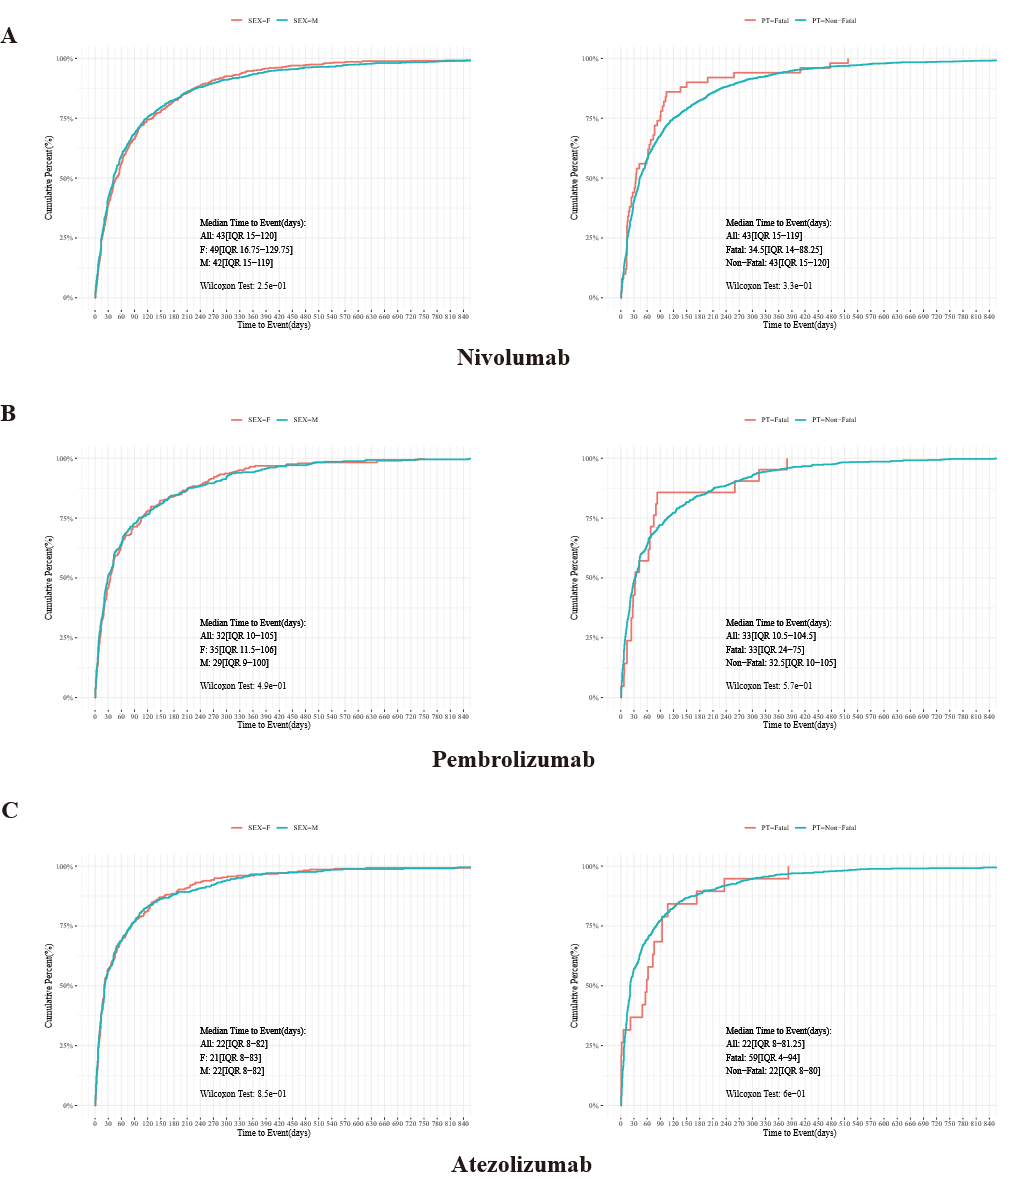


**Figure S1.** Kaplan-Meier curve analysis of factors associated with the TTO of the MNDs. (A-C) Time of the first MNDs in different sex and fatal outcome groups with nivolumab (A), pembrolizumab (B), atezolizumab (C).
