# Supplementary material
Source: Research Square preprint supplement (doi:10.21203/rs.3.rs-9051493/v1)
Supplement: Supplementary file 2 [file bcbfc23fafd73877bc51766b.docx]

**Supplementary material**

**Table S1.** The classic two-by-two contingency table.

|  | **Number of reports**  **for target AE** | **Number of**  **reports for other AEs** | **Total** |
| --- | --- | --- | --- |
| Target drug | a | b | a + b |
| Other drugs | c | d | c + d |
| Total | a + c | b + d | a + b + c + d |

**Table S2.** Overview of algorithms utilized for signal detection.

| Algorithm | Formulas | Criteria |
| --- | --- | --- |
| ROR |  | a≥3 |
|  | Lower limit of >1 |
| PRR |  | PRR≥2 |
|  | ≥4, a≥3 |
| BCPNN |  | IC025 >0 |
|  |
| MGPS |  | EBGM05>2 |

CI, conﬁdence interval; χ2, chi-squared; IC, information component; EBGM, empirical Bayes geometric mean.

**Table S3.** Positive disproportionality signals for MNDs of PD-1 inhibitors.

| **PT code** | **PT** | **N** | **ROR (95%Cl)** | **PRR (χ²)** | **BCPNN (IC025)** | **MGPS (EBGM05)** |
| --- | --- | --- | --- | --- | --- | --- |
| 10006895 | Cachexia | 338 | 12.12 (10.85-13.5) | 12.11 ( 3206.06 ) | 3.5 ( 3.3 ) | 11.34 (10.15) |
| 10067725 | Hyperlipasaemia | 17 | 6.06 ( 3.74 - 9.84 ) | 6.06 ( 69.32 ) | 2.56 ( 1.51 ) | 5.88 ( 3.62 ) |
| 10081755 | Steroid diabetes | 34 | 4.89 ( 3.48 - 6.88 ) | 4.89 ( 102.15 ) | 2.26 ( 1.61 ) | 4.78 ( 3.4 ) |
| 10012673 | Diabetic ketosis | 19 | 10.77 ( 6.77 - 17.13 ) | 10.77 ( 157.92 ) | 3.35 ( 2.13 ) | 10.16 ( 6.39 ) |
| 10020635 | Hyperglycaemia | 504 | 2.45 ( 2.24 - 2.67 ) | 2.45 ( 424.56 ) | 1.28 ( 1.14 ) | 2.42 ( 2.22 ) |
| 10020583 | Hypercalcaemia | 323 | 4.71 ( 4.22 - 5.26 ) | 4.71 ( 916.96 ) | 2.2 ( 2.02 ) | 4.6 ( 4.12 ) |
| 10021083 | Hypoproteinaemia | 40 | 3.91 ( 2.86 - 5.35 ) | 3.91 ( 84.7 ) | 1.94 ( 1.39 ) | 3.84 ( 2.81 ) |
| 10021148 | Hypozincaemia | 3 | 9.96 ( 3.1 - 31.95 ) | 9.96 ( 22.78 ) | 3.24 ( 0.1 ) | 9.44 ( 2.94 ) |
| 10021036 | Hyponatraemia | 852 | 2.68 ( 2.5 - 2.86 ) | 2.67 ( 877.84 ) | 1.4 ( 1.3 ) | 2.65 ( 2.47 ) |
| 10062770 | Hyperamylasaemia | 14 | 4.45 ( 2.62 - 7.56 ) | 4.45 ( 36.42 ) | 2.12 ( 1.07 ) | 4.36 ( 2.56 ) |
| 10023379 | Ketoacidosis | 122 | 2.9 ( 2.42 - 3.46 ) | 2.9 ( 148.71 ) | 1.52 ( 1.23 ) | 2.86 ( 2.39 ) |
| 10057248 | Cell death | 46 | 4.17 ( 3.11 - 5.58 ) | 4.17 ( 107.93 ) | 2.03 ( 1.51 ) | 4.09 ( 3.05 ) |
| 10020942 | Hypoalbuminaemia | 163 | 3.9 ( 3.34 - 4.56 ) | 3.9 ( 343.29 ) | 1.94 ( 1.69 ) | 3.83 ( 3.28 ) |
| 10045170 | Tumour lysis syndrome | 165 | 3.46 ( 2.96 - 4.03 ) | 3.45 ( 281.79 ) | 1.77 ( 1.52 ) | 3.4 ( 2.92 ) |
| 10077257 | Adult failure to thrive | 8 | 7.44 ( 3.66 - 15.11 ) | 7.44 ( 42.62 ) | 2.84 ( 1.1 ) | 7.15 ( 3.52 ) |
| 10016165 | Failure to thrive | 85 | 2.8 ( 2.26 - 3.47 ) | 2.8 ( 96.54 ) | 1.47 ( 1.13 ) | 2.77 ( 2.23 ) |
| 10072659 | Type 3 diabetes mellitus | 12 | 45.4 ( 23.94 - 86.09 ) | 45.4 ( 407.34 ) | 5.16 ( 2.39 ) | 35.71 ( 18.83 ) |
| 10012671 | Diabetic ketoacidosis | 742 | 5.58 ( 5.19 - 6.01 ) | 5.57 ( 2692.1 ) | 2.44 ( 2.32 ) | 5.42 ( 5.04 ) |
| 10038236 | Refeeding syndrome | 4 | 5.81 ( 2.14 - 15.75 ) | 5.81 ( 15.38 ) | 2.5 ( 0.23 ) | 5.64 ( 2.08 ) |
| 10067584 | Type 1 diabetes mellitus | 814 | 25.42 ( 23.61 - 27.37 ) | 25.37 ( 16483.9 ) | 4.46 ( 4.32 ) | 22.08 ( 20.51 ) |
| 10033660 | Pancreatogenous diabetes | 4 | 19.72 ( 6.99 - 55.66 ) | 19.72 ( 63.39 ) | 4.15 ( 0.65 ) | 17.69 ( 6.27 ) |
| 10061428 | Decreased appetite | 3370 | 2.48 ( 2.4 - 2.57 ) | 2.47 ( 2905.23 ) | 1.29 ( 1.24 ) | 2.44 ( 2.36 ) |
| 10060961 | Appetite disorder | 115 | 3.26 ( 2.71 - 3.92 ) | 3.26 ( 176.16 ) | 1.68 ( 1.38 ) | 3.21 ( 2.67 ) |
| 10052341 | Impaired insulin secretion | 5 | 8.22 ( 3.35 - 20.18 ) | 8.22 ( 30.16 ) | 2.98 ( 0.66 ) | 7.87 ( 3.2 ) |
| 10023392 | Ketosis-prone diabetes mellitus | 3 | 11.62 ( 3.6 - 37.49 ) | 11.62 ( 27.17 ) | 3.45 ( 0.14 ) | 10.91 ( 3.38 ) |
| 10066389 | Latent autoimmune diabetes in adults | 15 | 17.31 ( 10.16 - 29.47 ) | 17.31 ( 208.29 ) | 3.98 ( 2.27 ) | 15.74 ( 9.24 ) |
| 10074309 | Diabetic metabolic decompensation | 28 | 3.61 ( 2.48 - 5.25 ) | 3.61 ( 51.67 ) | 1.83 ( 1.16 ) | 3.55 ( 2.44 ) |
| 10063554 | Hyperglycaemic hyperosmolar  nonketotic syndrome | 27 | 4 ( 2.73 - 5.87 ) | 4 ( 59.38 ) | 1.98 ( 1.28 ) | 3.93 ( 2.68 ) |
| 10072628 | Fulminant type 1 diabetes mellitus | 494 | 198.2 ( 173.81 - 226.02 ) | 197.93 ( 43664.1 ) | 6.49 ( 6.09 ) | 89.84 ( 78.78 ) |

**Table S4.** Positive disproportionality signals for MNDs of PD-L1 inhibitors.

| **PT code** | **PT** | **N** | **ROR (95%Cl)** | **PRR (χ²)** | **BCPNN (IC025)** | **MGPS**  **(EBGM05)** |
| --- | --- | --- | --- | --- | --- | --- |
| 10020635 | Hyperglycaemia | 143 | 2.66 ( 2.26 - 3.13 ) | 2.66 ( 147.18 ) | 2.65 ( 2.25 ) | 1.41 ( 1.15 ) |
| 10020583 | Hypercalcaemia | 79 | 4.36 ( 3.5 - 5.44 ) | 4.36 ( 203.24 ) | 4.34 ( 3.48 ) | 2.12 ( 1.73 ) |
| 10020674 | Hypermetabolism | 6 | 8.05 ( 3.6 - 18.02 ) | 8.05 ( 36.6 ) | 7.96 ( 3.56 ) | 2.99 ( 0.9 ) |
| 10020646 | Hyperkalaemia | 131 | 2.56 ( 2.15 - 3.04 ) | 2.56 ( 123.59 ) | 2.55 ( 2.15 ) | 1.35 ( 1.08 ) |
| 10021015 | Hypokalaemia | 189 | 2.81 ( 2.43 - 3.24 ) | 2.8 ( 218.57 ) | 2.8 ( 2.42 ) | 1.48 ( 1.26 ) |
| 10021036 | Hyponatraemia | 329 | 3.96 ( 3.56 - 4.42 ) | 3.95 ( 721.87 ) | 3.93 ( 3.53 ) | 1.98 ( 1.8 ) |
| 10062770 | Hyperamylasaemia | 9 | 10.96 ( 5.67 - 21.18 ) | 10.96 ( 80.05 ) | 10.79 ( 5.58 ) | 3.43 ( 1.52 ) |
| 10020942 | Hypoalbuminaemia | 76 | 6.95 ( 5.55 - 8.72 ) | 6.95 ( 382.77 ) | 6.88 ( 5.49 ) | 2.78 ( 2.35 ) |
| 10045170 | Tumour lysis syndrome | 92 | 7.39 ( 6.02 - 9.08 ) | 7.38 ( 501.96 ) | 7.31 ( 5.95 ) | 2.87 ( 2.47 ) |
| 10012671 | Diabetic ketoacidosis | 131 | 3.71 ( 3.12 - 4.4 ) | 3.7 ( 256.93 ) | 3.69 ( 3.1 ) | 1.88 ( 1.6 ) |
| 10067584 | Type 1 diabetes mellitus | 162 | 17.4 ( 14.88 - 20.34 ) | 17.37 ( 2431.83 ) | 16.93 ( 14.48 ) | 4.08 ( 3.72 ) |
| 10062747 | Hypercreatininaemia | 4 | 5.49 ( 2.05 - 14.68 ) | 5.49 ( 14.54 ) | 5.45 ( 2.04 ) | 2.45 ( 0.23 ) |
| 10072628 | Fulminant type 1 diabetes mellitus | 67 | 50.67 ( 39.5 - 64.99 ) | 50.63 ( 3016.92 ) | 46.94 ( 36.59 ) | 5.55 ( 4.44 ) |
